# Supplementary material for: Holocene Paleoenvironmental Evolution of a Semi-Enclosed Shallow Aegean Basin: A Combination of Seismic Stratigraphy and Sediment Core Proxies
Source: MDPI journal article supplement (doi:10.3390/w14223688), 2022-11-15
Supplement: s1 [file s1]

## Supplementary Material

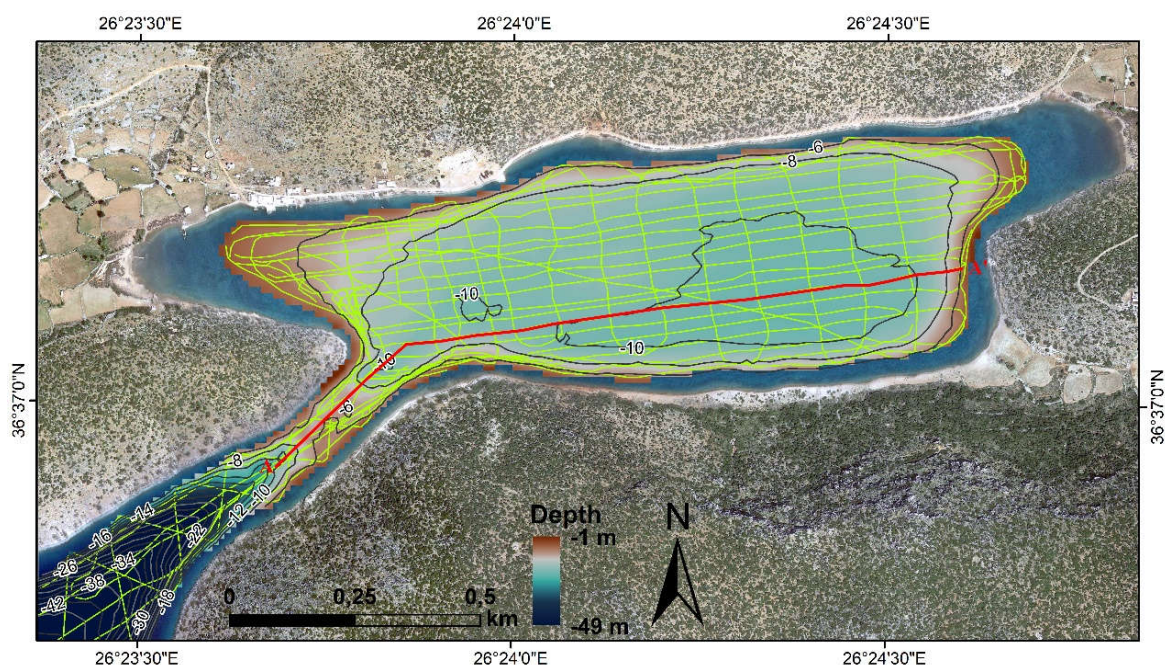

**Figure S1.** Bathymetric map of the study area showing the tracklines (green) of the subbottom profilers. The red colored transect (AA') indicates the location of the profile presented in Figure 2 and investigated in the manuscript.
